# Supplementary material
Source: PubMed Central journal article supplement (PMC1804366)
Supplement: JCI0726833sd.pdf [file JCI0726833sd.pdf]

**Figure 1s**

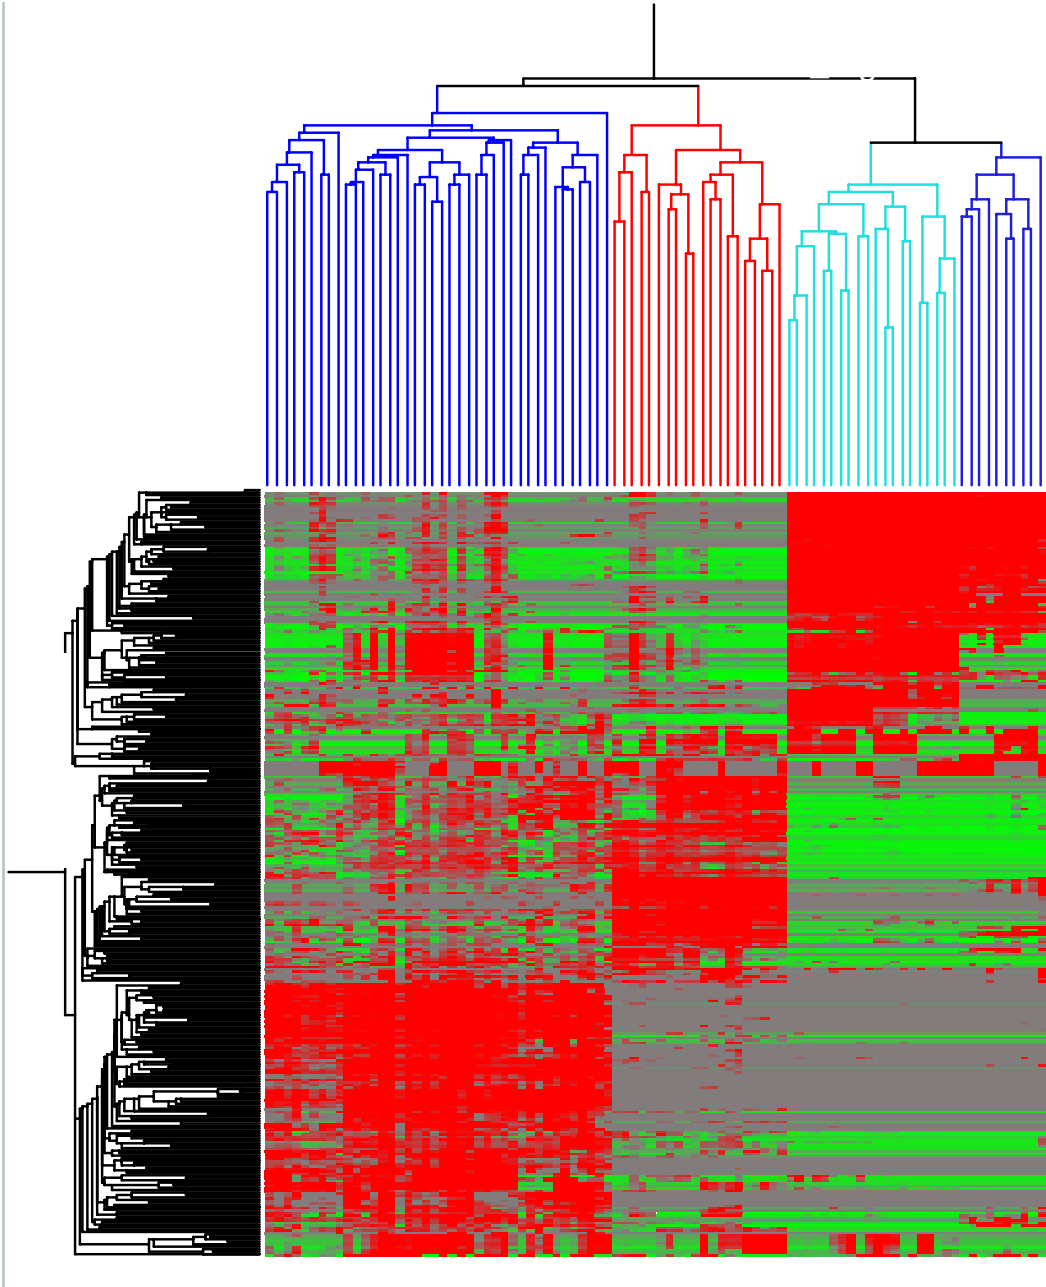

PTCLs

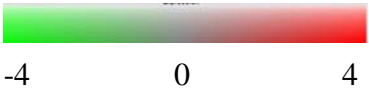

Normal T-cells

Normal B-cells

B-CLL

# Figure 2s

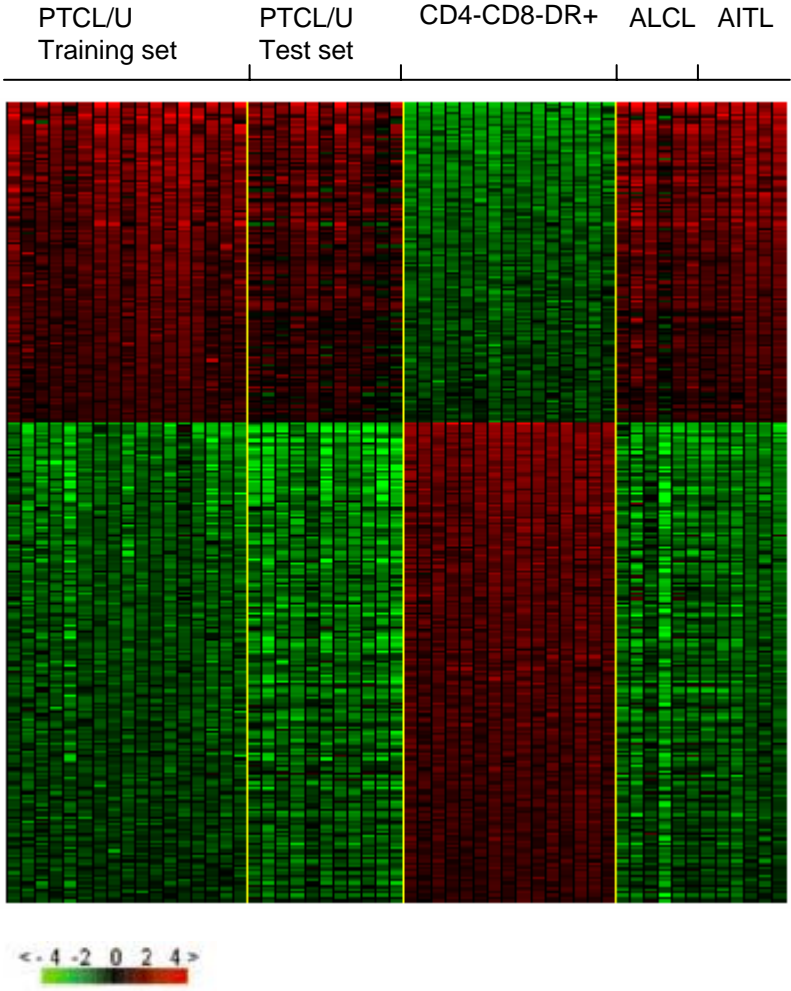

# Figure 3s

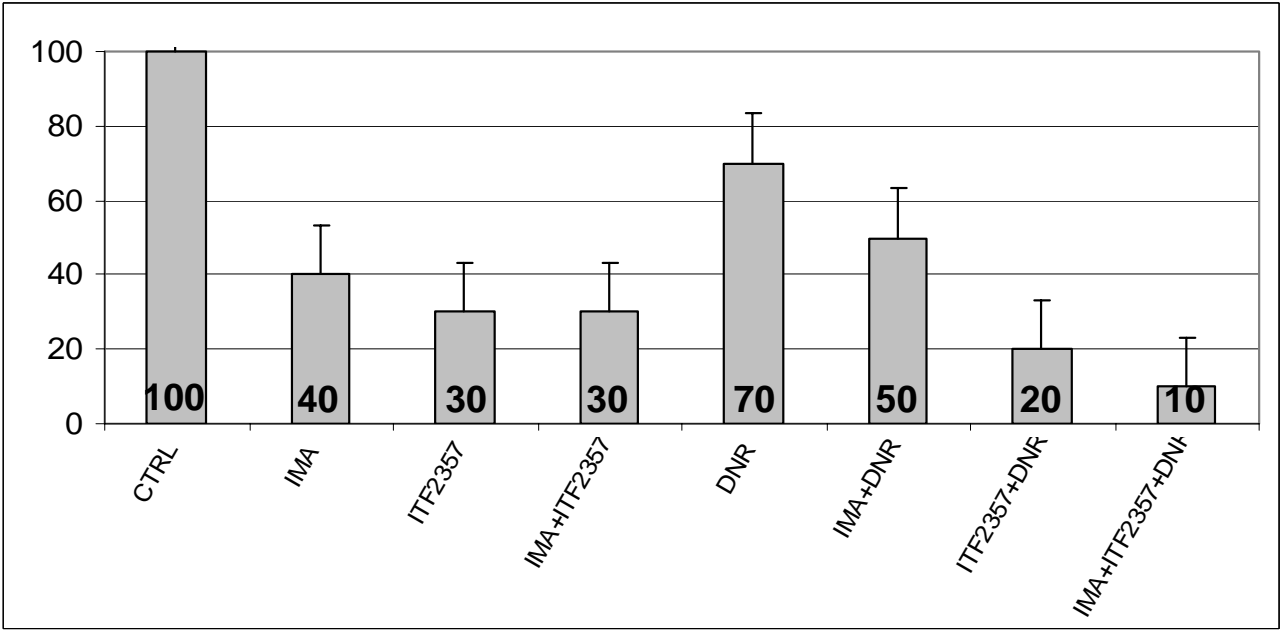

**Figure 1s. Unsupervised hierarchical clustering distinguishes PTCLs, B-CLL and normal B and T-lymphocytes.**

Unsupervised hierarchical clustering of gene expression profiles generated from PTCL/U (28), AITL (6), ALCL (6), B-CLL (10) and normal T- (20) and B-lymphocytes (20). The 90 samples are clustered according to their expression of 327 genes. Such approach promptly distinguished between T- and B-cell populations. Within each group, the samples clustered on the basis of their nature (i.e. B-cells vs. B-CLL and T-lymphocytes vs. PTCLs).

**Figure 2s. Supervised analysis of PTCL/U and other PTCLs identifies differentially expressed genes.**

Unsupervised analysis identified 155 genes that are differentially expressed in PTCL/U versus CD4, CD8 and HLA-DR+ lymphocytes (Figure 4). The expression of the 155 genes was then investigated in AITL and ALCL cases (represented on the right side of the matrix). The signature was largely shared by PTCL/U, AITL and ALCL.

**Figure 3s. Effects of imatinib, ITF2357, daunorubicin and their combinations on PTCL/U primary cells viability.**

PTCL/U primary cells were incubated for 48 hours in media containing 10% FBS with or without imatinib, ITF2357, and daunorubicin at 1, 0.5, and 5  $\mu$ M concentration respectively. Furthermore, all the possible combinations were tested using the same doses of each compound. While “double” combinations did not determine significant benefit, the association of the three drugs induced a striking effect on cell viability.

**Table 1s.** Gene categories differentially expressed in the two PTCL subgroups identified by unsupervised analysis (Figure 1). **All five categories were over-represented in Group 1.** The categories have been selected according to the Gene Ontology (GO) database and compared with the EASE software (see Methods section for details).

| <b>GO System</b>   | <b>Gene Category</b>          | <b>P value</b> |
|--------------------|-------------------------------|----------------|
| Biological Process | response to biotic stimulus   | 6.59e-004      |
| Biological Process | immune response               | 7.58e-004      |
| Biological Process | response to external stimulus | 2.96e-003      |
| Biological Process | defense response              | 2.99e-003      |
| Biological Process | response to stress            | 9.54e-003      |

**Table 2s.** Genes differentially expressed in HLA-DR+ vs. HLA-DR- non-neoplastic T-lymphocytes

| <i>Probe set</i> | <i>Common name</i>   | <i>GeneBank</i> | <i>Description</i>                                                    |
|------------------|----------------------|-----------------|-----------------------------------------------------------------------|
| 39402_at         | <i>IL1B</i>          | M15330          | interleukin 1, beta                                                   |
| 239704_at        | <i>IBRDC2</i>        | BE274992        | IBR domain containing 2                                               |
| 233555_s_at      | <i>SULF2</i>         | AL034418        |                                                                       |
| 231899_at        | <i>KIAA1726</i>      | AB051513        | KIAA1726 protein                                                      |
| 230689_at        |                      | AA825243        | Transcribed sequences                                                 |
| 230446_at        |                      | AI627850        | Transcribed sequences                                                 |
| 230276_at        | <i>DKFZP566A1524</i> | AI934342        | hypothetical protein<br>DKFZp566A1524                                 |
| 228585_at        | <i>ENTPD1</i>        | AI301948        | ectonucleoside triphosphate<br>diphosphohydrolase 1                   |
| 228056_s_at      | <i>NAPIL</i>         | AI763426        | napsin B pseudogene                                                   |
| 228055_at        | <i>NAPIL</i>         | AI763426        | napsin B pseudogene                                                   |
| 227970_at        | <i>GPR157</i>        | AK026883        | Similar to RIKEN cDNA<br>F730108M23 gene<br>(LOC400734), mRNA         |
| 227867_at        | <i>LOC129293</i>     | AA005361        | hypothetical protein<br>LOC129293                                     |
| 227140_at        |                      | AI343467        | CDNA FLJ11041 fis, clone<br>PLACE1004405                              |
| 226841_at        | <i>MPEG1</i>         | BF590697        | macrophage expressed gene 1                                           |
| 226818_at        | <i>MPEG1</i>         | T64884          | macrophage expressed gene 1                                           |
| 226694_at        | <i>AKAP2</i>         | BG540494        | paralemmin 2                                                          |
| 226517_at        | <i>BCAT1</i>         | AL390172        | Homo sapiens mRNA; cDNA<br>DKFZp547I204 (from clone<br>DKFZp547I204). |
| 226433_at        | <i>RNF157</i>        | BF056204        | ring finger protein 157                                               |
| 226397_s_at      |                      | BG502771        | CDNA: FLJ21028 fis, clone<br>CAE07155                                 |
| 226218_at        | <i>IL7R</i>          | BE217880        | interleukin 7 receptor                                                |
| 225897_at        | <i>MARCKS</i>        | AI709406        | myristoylated alanine-rich<br>protein kinase C substrate              |

|             |                 |           |                                                                                          |
|-------------|-----------------|-----------|------------------------------------------------------------------------------------------|
| 225710_at   |                 | H99792    | CDNA FLJ34013 fis, clone FCBBF2002111                                                    |
| 225285_at   | <i>BCAT1</i>    | AK025615  | branched chain aminotransferase 1, cytosolic                                             |
| 224795_x_at |                 | AW575927  | Immunoglobulin kappa light chain mRNA, partial cds                                       |
| 224724_at   | <i>SULF2</i>    | AL133001  | sulfatase 2                                                                              |
| 224654_at   | <i>DDX21</i>    | BG164358  | 602341831F1 NIH_MGC_89 Homo sapiens cDNA clone IMAGE:4452270 5', mRNA sequence.          |
| 224583_at   | <i>COTL1</i>    | AL565621  | coactosin-like 1 (Dictyostelium)                                                         |
| 224428_s_at | <i>CDCA7</i>    | AY029179  | cell division cycle associated 7                                                         |
| 224356_x_at | <i>MS4A6A</i>   | AF237908  | membrane-spanning 4-domains, subfamily A, member 6A                                      |
| 223484_at   | <i>NMES1</i>    | AF228422  | normal mucosa of esophagus specific 1                                                    |
| 223344_s_at | <i>MS4A7</i>    | AB026043  | membrane-spanning 4-domains, subfamily A, member 7                                       |
| 223343_at   | <i>MS4A7</i>    | AI301935  | membrane-spanning 4-domains, subfamily A, member 7                                       |
| 222862_s_at | <i>AK5</i>      | BG169832  | adenylate kinase 5                                                                       |
| 222680_s_at | <i>RAMP</i>     | AK001261  | RA-regulated nuclear matrix-associated protein                                           |
| 222496_s_at | <i>FLJ20273</i> | AW241742  | RNA-binding protein                                                                      |
| 222146_s_at | <i>TCF4</i>     | AK026674  | transcription factor 4                                                                   |
| 221841_s_at | <i>KLF4</i>     | BF514079  | Kruppel-like factor 4 (gut)                                                              |
| 221724_s_at | <i>CLECSF6</i>  | AF200738  | C-type (calcium dependent, carbohydrate-recognition domain) lectin, superfamily member 6 |
| 221671_x_at |                 | M63438    | Immunoglobulin kappa light chain mRNA, partial cds                                       |
| 221651_x_at | <i>IGKC</i>     | BC005332  | Homo sapiens cDNA clone MGC:12418 IMAGE:3934658, complete cds.                           |
| 221059_s_at | <i>CHST6</i>    | NM_021615 | carbohydrate (N-acetylglucosamine 6-O)                                                   |

|             |                 |           |                                                                                             |
|-------------|-----------------|-----------|---------------------------------------------------------------------------------------------|
|             |                 |           | sulfotransferase 6                                                                          |
| 220266_s_at | <i>KLF4</i>     | NM_004235 | Kruppel-like factor 4 (gut)                                                                 |
| 219947_at   | <i>CLECSF6</i>  | NM_016184 | C-type (calcium dependent, carbohydrate-recognition domain) lectin, superfamily member 6    |
| 219593_at   | <i>SLC15A3</i>  | NM_016582 | solute carrier family 15, member 3                                                          |
| 219584_at   | <i>PLA1A</i>    | NM_015900 | phospholipase A1 member A                                                                   |
| 218039_at   | <i>NUSAPI1</i>  | NM_016359 | nucleolar and spindle associated protein 1                                                  |
| 218035_s_at | <i>FLJ20273</i> | NM_019027 | RNA-binding protein                                                                         |
| 217979_at   | <i>TM4SF13</i>  | NM_014399 | transmembrane 4 superfamily member 13                                                       |
| 217764_s_at | <i>RAB31</i>    | AF183421  | RAB31, member RAS oncogene family                                                           |
| 217763_s_at | <i>RAB31</i>    | NM_006868 | RAB31, member RAS oncogene family                                                           |
| 217762_s_at | <i>RAB31</i>    | BE789881  | RAB31, member RAS oncogene family                                                           |
| 217678_at   | <i>SLC7A11</i>  | AA488687  | solute carrier family 7, (cationic amino acid transporter, y <sup>+</sup> system) member 11 |
| 217478_s_at | <i>HLA-DMA</i>  | X76775    |                                                                                             |
| 217414_x_at | <i>HBA2</i>     | V00489    | Human alpha-globin gene with flanks.                                                        |
| 217388_s_at | <i>KYNU</i>     | D55639    | kynureninase (L-kynurenine hydrolase)                                                       |
| 216243_s_at | <i>IL1RN</i>    | BE563442  | interleukin 1 receptor antagonist                                                           |
| 215633_x_at | <i>LST1</i>     | AV713720  | AV713720 DCB Homo sapiens cDNA clone DCBBJA12 5', mRNA sequence.                            |
| 215537_x_at | <i>DDAH2</i>    | AJ012008  |                                                                                             |
| 215193_x_at | <i>HLA-DRB3</i> | AJ297586  | major histocompatibility complex, class II, DR beta 3                                       |
| 215177_s_at | <i>ITGA6</i>    | AV733308  | integrin, alpha 6                                                                           |
| 214945_at   | <i>NY-REN-7</i> | AW514267  | NY-REN-7 antigen                                                                            |
| 214414_x_at | <i>HBA2</i>     | T50399    | hemoglobin, alpha 2                                                                         |



|             |                 |           |                                                                                           |
|-------------|-----------------|-----------|-------------------------------------------------------------------------------------------|
| 214390_s_at | <i>BCAT1</i>    | AI652662  | branched chain aminotransferase 1, cytosolic                                              |
| 213975_s_at | <i>LYZ</i>      | AV711904  | AV711904 DCA Homo sapiens cDNA clone DCAAIE08 5', mRNA sequence.                          |
| 213891_s_at | <i>TCF4</i>     | AI927067  | transcription factor 4                                                                    |
| 213566_at   | <i>RNASE6</i>   | NM_005615 | ribonuclease, RNase A family, k6                                                          |
| 213533_at   | <i>D4S234E</i>  | M98528    | Homo sapiens neuron-specific protein gene, last exon, clone D4S234.                       |
| 213479_at   | <i>NPTX2</i>    | U26662    | neuronal pentraxin II                                                                     |
| 213415_at   | <i>CLIC2</i>    | AI768628  | chloride intracellular channel 2                                                          |
| 213258_at   | <i>TFPI</i>     | BF511231  | tissue factor pathway inhibitor (lipoprotein-associated coagulation inhibitor)            |
| 213002_at   | <i>MARCKS</i>   | AA770596  | myristoylated alanine-rich protein kinase C substrate                                     |
| 212822_at   | <i>HEG</i>      | AA121502  | HEG homolog                                                                               |
| 212681_at   | <i>EPB41L3</i>  | AI770004  | erythrocyte membrane protein band 4.1-like 3                                              |
| 212671_s_at | <i>HLA-DQA1</i> | BG397856  | major histocompatibility complex, class II, DQ alpha 1                                    |
| 212592_at   | <i>IGJ</i>      | AV733266  | immunoglobulin J polypeptide, linker protein for immunoglobulin alpha and mu polypeptides |
| 212387_at   | <i>TCF4</i>     | BG495771  | transcription factor 4                                                                    |
| 212386_at   | <i>TCF4</i>     | BF592782  | transcription factor 4                                                                    |
| 212385_at   | <i>TCF4</i>     | AU118026  | transcription factor 4                                                                    |
| 212382_at   | <i>TCF4</i>     | BF433429  | transcription factor 4                                                                    |
| 211991_s_at | <i>HLA-DPA1</i> | M27487    | major histocompatibility complex, class II, DP alpha 1                                    |
| 211990_at   | <i>HLA-DPA1</i> | M27487    | major histocompatibility complex, class II, DP alpha 1                                    |
| 211745_x_at | <i>HBA2</i>     | BC005931  | hemoglobin, alpha 2                                                                       |
| 211699_x_at | <i>HBA2</i>     | AF349571  | hemoglobin, alpha 2                                                                       |

|             |                |          |                                                                                             |
|-------------|----------------|----------|---------------------------------------------------------------------------------------------|
| 211506_s_at | <i>IL8</i>     | AF043337 | Homo sapiens interleukin 8 C-terminal variant (IL8) mRNA, complete cds.                     |
| 210982_s_at | <i>HLA-DRA</i> | M60333   | major histocompatibility complex, class II, DR alpha                                        |
| 210895_s_at | <i>CD86</i>    | L25259   | CD86 antigen (CD28 antigen ligand 2, B7-2 antigen)                                          |
| 210664_s_at | <i>TFPI</i>    | AF021834 | tissue factor pathway inhibitor (lipoprotein-associated coagulation inhibitor)              |
| 210663_s_at | <i>KYNU</i>    | BC000879 | kynureninase (L-kynurenine hydrolase)                                                       |
| 210512_s_at | <i>VEGF</i>    | AF022375 | vascular endothelial growth factor                                                          |
| 210340_s_at | <i>CSF2RA</i>  | BC002635 | colony stimulating factor 2 receptor, alpha, low-affinity (granulocyte-macrophage)          |
| 210146_x_at | <i>LILRB2</i>  | AF004231 | leukocyte immunoglobulin-like receptor, subfamily B (with TM and ITIM domains), member 2    |
| 210118_s_at | <i>IL1A</i>    | M15329   | interleukin 1, alpha                                                                        |
| 210073_at   | <i>SIAT8A</i>  | L32867   | sialyltransferase 8A (alpha-N-acetylneuraminate: alpha-2,8-sialyltransferase, GD3 synthase) |
| 209921_at   | <i>SLC7A11</i> | AB040875 | solute carrier family 7, (cationic amino acid transporter, y+ system) member 11             |
| 209901_x_at | <i>AIF1</i>    | U19713   | allograft inflammatory factor 1                                                             |
| 209871_s_at | <i>APBA2</i>   | AB014719 | amyloid beta (A4) precursor protein-binding, family A, member 2 (X11-like)                  |
| 209774_x_at | <i>CXCL2</i>   | M57731   | chemokine (C-X-C motif) ligand 2                                                            |

|             |                      |           |                                                                                                                                                                        |
|-------------|----------------------|-----------|------------------------------------------------------------------------------------------------------------------------------------------------------------------------|
| 209684_at   | <i>RIN2</i>          | AL136924  | Ras and Rab interactor 2                                                                                                                                               |
| 209683_at   | <i>DKFZP566A1524</i> | AA243659  | hypothetical protein<br>DKFZp566A1524                                                                                                                                  |
| 209619_at   | <i>CD74</i>          | K01144    | CD74 antigen (invariant polypeptide of major histocompatibility complex, class II antigen-associated)                                                                  |
| 209458_x_at | <i>HBA2</i>          | AF105974  | hemoglobin, alpha 2                                                                                                                                                    |
| 209312_x_at | <i>HLA-DRB1</i>      | U65585    | major histocompatibility complex, class II, DR beta 3                                                                                                                  |
| 209191_at   | <i>MGC4083</i>       | BC002654  | tubulin beta MGC4083                                                                                                                                                   |
| 209184_s_at | <i>IRS2</i>          | BF700086  | 602127569F1 NIH_MGC_56 Homo sapiens cDNA clone IMAGE:4284401 5', mRNA sequence.                                                                                        |
| 209116_x_at | <i>HBB</i>           | M25079    | Human sickle cell beta-globin mRNA, complete cds.                                                                                                                      |
| 208949_s_at | <i>LGALS3</i>        | BC001120  | lectin, galactoside-binding, soluble, 3 (galectin 3)                                                                                                                   |
| 208894_at   | <i>HLA-DRA</i>       | M60334    | major histocompatibility complex, class II, DR alpha                                                                                                                   |
| 208890_s_at | <i>PLXNB2</i>        | BC004542  | plexin B2                                                                                                                                                              |
| 208864_s_at | <i>TXN</i>           | AF313911  | thioredoxin                                                                                                                                                            |
| 208594_x_at | <i>ILT8</i>          | NM_024318 | synonym: LILRB6; immunoglobulin-like transcript 8; Homo sapiens leukocyte immunoglobulin-like receptor, subfamily B (with TM and ITIM domains), member 6 (ILT8), mRNA. |
| 208306_x_at | <i>HLA-DRB3</i>      | NM_021983 | major histocompatibility complex, class II, DR beta 3                                                                                                                  |
| 208146_s_at | <i>CPVL</i>          | NM_031311 | carboxypeptidase, vitellogenic-like                                                                                                                                    |
| 207850_at   | <i>CXCL3</i>         | NM_002090 | chemokine (C-X-C motif) ligand 3                                                                                                                                       |
| 207697_x_at | <i>LILRB2</i>        | NM_005874 | leukocyte immunoglobulin-like receptor, subfamily B (with TM and ITIM domains), member 2                                                                               |

|             |                 |           |                                                                                    |
|-------------|-----------------|-----------|------------------------------------------------------------------------------------|
| 207540_s_at | <i>SYK</i>      | NM_003177 | spleen tyrosine kinase                                                             |
| 207085_x_at | <i>CSF2RA</i>   | NM_006140 | colony stimulating factor 2 receptor, alpha, low-affinity (granulocyte-macrophage) |
| 206710_s_at | <i>EPB41L3</i>  | NM_012307 | erythrocyte membrane protein band 4.1-like 3                                       |
| 206632_s_at | <i>APOBEC3B</i> | NM_004900 | apolipoprotein B mRNA editing enzyme, catalytic polypeptide-like 3B                |
| 206488_s_at | <i>CD36</i>     | NM_000072 | CD36 antigen (collagen type I receptor, thrombospondin receptor)                   |
| 206380_s_at | <i>PFC</i>      | NM_002621 | properdin P factor, complement                                                     |
| 206157_at   | <i>PTX3</i>     | NM_002852 | pentaxin-related gene, rapidly induced by IL-1 beta                                |
| 205997_at   | <i>ADAM28</i>   | NM_021778 | a disintegrin and metalloproteinase domain 28                                      |
| 205859_at   | <i>LY86</i>     | NM_004271 | lymphocyte antigen 86                                                              |
| 205767_at   | <i>EREG</i>     | NM_001432 | epiregulin                                                                         |
| 205559_s_at | <i>PCSK5</i>    | NM_006200 | proprotein convertase subtilisin/kexin type 5                                      |
| 205237_at   | <i>FCNI</i>     | NM_002003 | ficolin (collagen/fibrinogen domain containing) 1                                  |
| 205207_at   | <i>IL6</i>      | NM_000600 | interleukin 6 (interferon, beta 2)                                                 |
| 205159_at   | <i>CSF2RB</i>   | AV756141  | colony stimulating factor 2 receptor, beta, low-affinity (granulocyte-macrophage)  |
| 205067_at   | <i>IL1B</i>     | NM_000576 | interleukin 1, beta                                                                |
| 204971_at   | <i>CSTA</i>     | NM_005213 | cystatin A (stefin A)                                                              |

|             |                 |           |                                                                                       |
|-------------|-----------------|-----------|---------------------------------------------------------------------------------------|
| 204793_at   | <i>GASP</i>     | NM_014710 |                                                                                       |
| 204777_s_at | <i>MAL</i>      | NM_002371 | mal, T-cell differentiation protein                                                   |
| 204748_at   | <i>PTGS2</i>    | NM_000963 | prostaglandin-endoperoxide synthase 2 (prostaglandin G/H synthase and cyclooxygenase) |
| 204670_x_at | <i>HLA-DRB3</i> | NM_002125 | major histocompatibility complex, class II, DR beta 3                                 |
| 204614_at   | <i>SERPINB2</i> | NM_002575 | serine (or cysteine) proteinase inhibitor, clade B (ovalbumin), member 2              |
| 204249_s_at | <i>LMO2</i>     | NM_005574 | LIM domain only 2 (rhombotin-like 1)                                                  |
| 204112_s_at | <i>HNMT</i>     | NM_006895 | histamine N-methyltransferase                                                         |
| 204018_x_at | <i>HBA2</i>     | NM_000558 | hemoglobin, alpha 2                                                                   |
| 203932_at   | <i>HLA-DMB</i>  | NM_002118 | major histocompatibility complex, class II, DM beta                                   |
| 203888_at   | <i>THBD</i>     | NM_000361 | thrombomodulin                                                                        |
| 203887_s_at | <i>THBD</i>     | NM_000361 | thrombomodulin                                                                        |
| 203753_at   | <i>TCF4</i>     | NM_003199 | transcription factor 4                                                                |
| 203509_at   | <i>SORL1</i>    | NM_003105 | sortilin-related receptor, L(DLR class) A repeats-containing                          |
| 203413_at   | <i>NELL2</i>    | NM_006159 | NEL-like 2 (chicken)                                                                  |
| 202949_s_at | <i>FHL2</i>     | NM_001450 | four and a half LIM domains 2                                                         |
| 202933_s_at | <i>YES1</i>     | NM_005433 | v-yes-1 Yamaguchi sarcoma viral oncogene homolog 1                                    |
| 202932_at   | <i>YES1</i>     | NM_005433 | v-yes-1 Yamaguchi sarcoma viral oncogene homolog 1                                    |
| 202897_at   | <i>PTPNS1</i>   | AB023430  | protein tyrosine phosphatase, non-receptor type substrate 1                           |
| 202503_s_at | <i>KIAA0101</i> | NM_014736 | KIAA0101 gene product                                                                 |
| 202391_at   | <i>BASP1</i>    | NM_006317 | brain abundant, membrane attached signal protein 1                                    |

|             |                 |           |                                                                                                                             |
|-------------|-----------------|-----------|-----------------------------------------------------------------------------------------------------------------------------|
| 202345_s_at | <i>FABP5</i>    | NM_001444 | fatty acid binding protein 5 (psoriasis-associated)                                                                         |
| 202286_s_at | <i>TACSTD2</i>  | J04152    | GA733-1 protein precursor; Human gastrointestinal tumor-associated antigen GA733-1 protein gene, complete cds, clone 05516. |
| 202283_at   | <i>SERPINF1</i> | NM_002615 | serine (or cysteine) proteinase inhibitor, clade F (alpha-2 antiplasmin, pigment epithelium derived factor), member 1       |
| 202262_x_at | <i>DDAH2</i>    | NM_013974 | dimethylarginine dimethylaminohydrolase 2                                                                                   |
| 202241_at   | <i>TRIB1</i>    | NM_025195 | phosphoprotein regulated by mitogenic pathways                                                                              |
| 202085_at   | <i>TJP2</i>     | NM_004817 | tight junction protein 2 (zona occludens 2)                                                                                 |
| 201887_at   | <i>IL13RA1</i>  | NM_001560 | interleukin 13 receptor, alpha 1                                                                                            |
| 201820_at   | <i>KRT5</i>     | NM_000424 | keratin 5 (epidermolysis bullosa simplex, Dowling-Meara/Kobner/Weber-Cockayne types)                                        |
| 201798_s_at | <i>FERIL3</i>   | NM_013451 | fer-1-like 3, myoferlin ( <i>C. elegans</i> )                                                                               |
| 201710_at   | <i>MYBL2</i>    | NM_002466 | v-myb myeloblastosis viral oncogene homolog (avian)-like 2                                                                  |
| 201670_s_at | <i>MARCKS</i>   | M68956    | myristoylated alanine-rich protein kinase C substrate                                                                       |
| 201669_s_at | <i>MARCKS</i>   | NM_002356 | myristoylated alanine-rich protein kinase C substrate                                                                       |
| 201656_at   | <i>ITGA6</i>    | NM_000210 | integrin, alpha 6                                                                                                           |
| 201506_at   | <i>TGFBI</i>    | NM_000358 | transforming growth factor, beta-induced, 68kDa                                                                             |
| 201489_at   | <i>PPIF</i>     | BC005020  | peptidylprolyl isomerase F (cyclophilin F)                                                                                  |
| 201425_at   | <i>ALDH2</i>    | NM_000690 | aldehyde dehydrogenase 2 family (mitochondrial)                                                                             |
| 201422_at   | <i>IFI30</i>    | NM_006332 | interferon, gamma-inducible protein 30                                                                                      |
| 201360_at   | <i>CST3</i>     | NM_000099 | cystatin C (amyloid angiopathy and cerebral                                                                                 |

|              |                 |           |                                                                                                                                             |
|--------------|-----------------|-----------|---------------------------------------------------------------------------------------------------------------------------------------------|
|              |                 |           | hemorrhage)                                                                                                                                 |
| 201292_at    | <i>TOP2A</i>    | AL561834  | topoisomerase (DNA) II alpha 170kDa                                                                                                         |
| 201212_at    | <i>LGMN</i>     | D55696    | legumain                                                                                                                                    |
| 201137_s_at  | <i>HLA-DPB1</i> | NM_002121 | major histocompatibility complex, class II, DP beta 1                                                                                       |
| 200871_s_at  | <i>PSAP</i>     | NM_002778 | prosaposin (variant Gaucher disease and variant metachromatic leukodystrophy)                                                               |
| 200866_s_at  | <i>PSAP</i>     | M32221    | prosaposin (variant Gaucher disease and variant metachromatic leukodystrophy)                                                               |
| 200839_s_at  | <i>CTSB</i>     | NM_001908 | cathepsin B                                                                                                                                 |
| 200838_at    | <i>CTSB</i>     | NM_001908 | cathepsin B                                                                                                                                 |
| 200788_s_at  | <i>PEA15</i>    | NM_003768 | phosphoprotein enriched in astrocytes 15                                                                                                    |
| 200736_s_at  | <i>GPX1</i>     | NM_000581 | glutathione peroxidase 1                                                                                                                    |
| 200678_x_at  | <i>GRN</i>      | NM_002087 | granulin                                                                                                                                    |
| 1569110_x_at | <i>PDCD6</i>    | BC020552  | programmed cell death 6                                                                                                                     |
| 1567628_at   | <i>CD74</i>     | M28590    | CD74 antigen (invariant polypeptide of major histocompatibility complex, class II antigen-associated)                                       |
| 1558662_s_at | <i>BANK1</i>    | BG200452  | B-cell scaffold protein with ankyrin repeats 1                                                                                              |
| 1556346_at   |                 | AJ227860  | Partial mRNA; ID YG39-1A                                                                                                                    |
| 1555745_a_at | <i>LYZ</i>      | U25677    | lysozyme (renal amyloidosis)                                                                                                                |
| 1554899_s_at | <i>FCER1G</i>   | BC020763  | Homo sapiens Fc fragment of IgE, high affinity I, receptor for; gamma polypeptide, mRNA (cDNA clone MGC:22620 IMAGE:4704425), complete cds. |
| 1552519_at   | <i>ACVR1C</i>   | NM_145259 | activin A receptor, type IC                                                                                                                 |

**Table 3s.** Genes differentially expressed in CD4+ vs. CD8+ non-neoplastic T-lymphocytes

| <i>Probe set</i> | <i>Common name</i> | <i>GeneBank</i> | <i>Description</i>                                                                               |
|------------------|--------------------|-----------------|--------------------------------------------------------------------------------------------------|
| 39402_at         | <i>IL1B</i>        | M15330          | interleukin 1, beta                                                                              |
| 37145_at         | <i>GNLY</i>        | M85276          | Homo sapiens NKG5 gene, complete cds.                                                            |
| 36711_at         | <i>MAFF</i>        | AL021977        | Human DNA sequence from clone CTA-447C4 on chromosome 22q12.2-13.2, complete sequence.           |
| 242385_at        | <i>RORB</i>        | R18374          | RAR-related orphan receptor B                                                                    |
| 236782_at        | <i>SAMD3</i>       | AI129628        | sterile alpha motif domain containing 3                                                          |
| 231776_at        | <i>EOMES</i>       | NM_005442       | eomesodermin homolog (Xenopus laevis)                                                            |
| 231093_at        | <i>FCRH3</i>       | BF514552        | Fc receptor-like protein 3                                                                       |
| 230508_at        | <i>DKK3</i>        | AL569601        | dickkopf homolog 3 (Xenopus laevis)                                                              |
| 229309_at        | <i>ADRB1</i>       | AI625747        | adrenergic, beta-1-, receptor                                                                    |
| 226731_at        | <i>ITGA1</i>       | AA156873        | integrin, alpha 1                                                                                |
| 226694_at        | <i>AKAP2</i>       | BG540494        | paralemmin 2                                                                                     |
| 225496_s_at      | <i>SYTL2</i>       | N21426          | yx58d01.s1 Soares melanocyte 2NbHM Homo sapiens cDNA clone IMAGE:265921 3', mRNA sequence.       |
| 223280_x_at      | <i>MS4A6A</i>      | AF253977        | membrane-spanning 4-domains, subfamily A, member 6A                                              |
| 221127_s_at      | <i>RIG</i>         | NM_006394       |                                                                                                  |
| 220646_s_at      | <i>KLRF1</i>       | NM_016523       | killer cell lectin-like receptor subfamily F, member 1                                           |
| 220307_at        | <i>CD244</i>       | NM_016382       | CD244 natural killer cell receptor 2B4                                                           |
| 219666_at        | <i>MS4A6A</i>      | NM_022349       | membrane-spanning 4-domains, subfamily A, member 6A                                              |
| 219033_at        | <i>FLJ21308</i>    | NM_024615       | hypothetical protein FLJ21308                                                                    |
| 219013_at        | <i>GALNT11</i>     | NM_022087       | UDP-N-acetyl-alpha-D-galactosamine:polypeptide N-acetylgalactosaminyltransferase 11 (GalNAc-T11) |
| 216920_s_at      | <i>TRGV9</i>       | M27331          | T cell receptor gamma locus                                                                      |
| 216676_x_at      | <i>KIR2DS2</i>     | AC006293        |                                                                                                  |
| 216191_s_at      | <i>TRD@</i>        | X72501          | T cell receptor delta locus                                                                      |
| 215894_at        | <i>PTGDR</i>       | AI460323        | prostaglandin D2 receptor (DP)                                                                   |



|             |               |           |                                                                                                               |
|-------------|---------------|-----------|---------------------------------------------------------------------------------------------------------------|
| 215806_x_at | <i>TRGV9</i>  | M13231    | T cell receptor gamma locus                                                                                   |
| 214660_at   | <i>ITGA1</i>  | X68742    | integrin, alpha 1                                                                                             |
| 214567_s_at | <i>XCLI</i>   | NM_003175 | chemokine (C motif) ligand 2                                                                                  |
| 214450_at   | <i>CTSW</i>   | NM_001335 | cathepsin W (lymphopain)                                                                                      |
| 214247_s_at | <i>DKK3</i>   | AU148057  | dickkopf homolog 3 ( <i>Xenopus laevis</i> )                                                                  |
| 213975_s_at | <i>LYZ</i>    | AV711904  | AV711904 DCA Homo sapiens cDNA clone DCAAIE08 5', mRNA sequence.                                              |
| 213915_at   | <i>NKG7</i>   | NM_005601 | natural killer cell group 7 sequence                                                                          |
| 213385_at   | <i>CHN2</i>   | AK026415  | chimerin (chimaerin) 2                                                                                        |
| 212240_s_at | <i>PIK3R1</i> | AI679268  | phosphoinositide-3-kinase, regulatory subunit, polypeptide 1 (p85 alpha)                                      |
| 211144_x_at | <i>TRGV9</i>  | M30894    | T cell receptor gamma locus                                                                                   |
| 210690_at   | <i>KLRC4</i>  | U96845    | killer cell lectin-like receptor subfamily C, member 4                                                        |
| 210606_x_at | <i>KLRD1</i>  | U30610    | killer cell lectin-like receptor subfamily D, member 1                                                        |
| 210354_at   | <i>IFNG</i>   | M29383    | Human mRNA for HuIFN-gamma interferon.                                                                        |
| 210140_at   | <i>CST7</i>   | AF031824  | cystatin F (leukocystatin)                                                                                    |
| 209993_at   | <i>ABCB1</i>  | AF016535  | ATP-binding cassette, sub-family B (MDR/TAP), member 1                                                        |
| 209813_x_at | <i>TRGV9</i>  | M16768    | T-cell receptor (V-J-C) precursor; Human T-cell receptor gamma chain VJCI-CII-CIII region mRNA, complete cds. |
| 208983_s_at | <i>PECAM1</i> | M37780    | platelet/endothelial cell adhesion molecule (CD31 antigen)                                                    |
| 208982_at   | <i>PECAM1</i> | AW574504  | UI-HF-BK0-aab-h-05-0-UI.s1 NIH_MGC_36 Homo sapiens cDNA clone IMAGE:3053409 3', mRNA sequence.                |
| 207979_s_at | <i>CD8B1</i>  | NM_004931 | CD8 antigen, beta polypeptide 1 (p37)                                                                         |
| 207840_at   | <i>CD160</i>  | NM_007053 | CD160 antigen                                                                                                 |
| 207795_s_at | <i>KLRD1</i>  | AB009597  | killer cell lectin-like receptor subfamily D, member 1                                                        |

|             |                |           |                                                                                                                                                                                                                                                                                                                                                                                                                                                                                                                                                                                                                                    |
|-------------|----------------|-----------|------------------------------------------------------------------------------------------------------------------------------------------------------------------------------------------------------------------------------------------------------------------------------------------------------------------------------------------------------------------------------------------------------------------------------------------------------------------------------------------------------------------------------------------------------------------------------------------------------------------------------------|
| 207723_s_at | <i>KLRC3</i>   | NM_002261 | synonyms: NKG2E, NKG2-E; isoform NKG2-E is encoded by transcript variant NKG2-E; go_component: integral to membrane [goid 0016021] [evidence IEA]; go_function: transmembrane receptor activity [goid 0004888] [evidence TAS] [pmid 9683661]; go_function: lectin [goid 0005530] [evidence IEA]; go_function: sugar binding [goid 0005529] [evidence IEA]; go_process: cellular defense response [goid 0006968] [evidence TAS] [pmid 9683661]; go_process: heterophilic cell adhesion [goid 0007157] [evidence IEA]; Homo sapiens killer cell lectin-like receptor subfamily C, member 3 (KLRC3), transcript variant NKG2-E, mRNA. |
| 207314_x_at | <i>KIR2DL3</i> | NM_006737 | killer cell immunoglobulin-like receptor, three domains, long cytoplasmic tail, 1                                                                                                                                                                                                                                                                                                                                                                                                                                                                                                                                                  |
| 207001_x_at | <i>DSIP1</i>   | NM_004089 | delta sleep inducing peptide, immunoreactor                                                                                                                                                                                                                                                                                                                                                                                                                                                                                                                                                                                        |
| 206914_at   | <i>CRTAM</i>   | NM_019604 | class-I MHC-restricted T cell associated molecule                                                                                                                                                                                                                                                                                                                                                                                                                                                                                                                                                                                  |
| 206785_s_at | <i>KLRC1</i>   | NM_002260 | killer cell lectin-like receptor subfamily C, member 2                                                                                                                                                                                                                                                                                                                                                                                                                                                                                                                                                                             |
| 206666_at   | <i>GZMK</i>    | NM_002104 | granzyme K (serine protease, granzyme 3; tryptase II)                                                                                                                                                                                                                                                                                                                                                                                                                                                                                                                                                                              |
| 206366_x_at | <i>XCL1</i>    | U23772    | chemokine (C motif) ligand 1                                                                                                                                                                                                                                                                                                                                                                                                                                                                                                                                                                                                       |
| 206365_at   | <i>XCL1</i>    | NM_002995 | chemokine (C motif) ligand 1                                                                                                                                                                                                                                                                                                                                                                                                                                                                                                                                                                                                       |
| 206267_s_at | <i>MATK</i>    | NM_002378 | megakaryocyte-associated tyrosine kinase                                                                                                                                                                                                                                                                                                                                                                                                                                                                                                                                                                                           |
| 206118_at   | <i>STAT4</i>   | NM_003151 | signal transducer and activator of transcription 4                                                                                                                                                                                                                                                                                                                                                                                                                                                                                                                                                                                 |
| 205821_at   | <i>KLRK1</i>   | NM_007360 | killer cell lectin-like receptor subfamily K, member 1                                                                                                                                                                                                                                                                                                                                                                                                                                                                                                                                                                             |
| 205758_at   | <i>CD8A</i>    | AW006735  | CD8 antigen, alpha polypeptide (p32)                                                                                                                                                                                                                                                                                                                                                                                                                                                                                                                                                                                               |

|              |              |           |                                                        |
|--------------|--------------|-----------|--------------------------------------------------------|
| 205495_s_at  | <i>GNLY</i>  | NM_006433 | granulysin                                             |
| 205336_at    | <i>PVALB</i> | NM_002854 | parvalbumin                                            |
| 204655_at    | <i>CCL5</i>  | NM_002985 | chemokine (C-C motif) ligand 5                         |
| 204011_at    | <i>SPRY2</i> | NM_005842 | sprouty homolog 2 (Drosophila)                         |
| 203413_at    | <i>NELL2</i> | NM_006159 | NEL-like 2 (chicken)                                   |
| 202806_at    | <i>DBN1</i>  | NM_004395 | drebrin 1                                              |
| 202196_s_at  | <i>DKK3</i>  | NM_013253 | dickkopf homolog 3 (Xenopus laevis)                    |
| 201506_at    | <i>TGFBI</i> | NM_000358 | transforming growth factor, beta-induced, 68kDa        |
| 201161_s_at  | <i>CSDA</i>  | NM_003651 | cold shock domain protein A                            |
| 201160_s_at  | <i>CSDA</i>  | AL556190  | cold shock domain protein A                            |
| 1555938_x_at | <i>VIM</i>   | A1520969  | Vimentin                                               |
| 1555759_a_at | <i>CCL5</i>  | AF043341  | chemokine (C-C motif) ligand 5                         |
| 1555691_a_at | <i>KLRK1</i> | AF439512  | killer cell lectin-like receptor subfamily K, member 1 |
| 1405_i_at    | <i>CCL5</i>  | M21121    | chemokine (C-C motif) ligand 5                         |

**Table 4s.** Histologic, and immunophenotypic characteristics of the 28 PTCLs/U studied by gene expression profiling

| Case | Percentage of neoplastic cells | Reactive cells                                                                                                                | Immuno-phenotype | Closest normal counterpart* |
|------|--------------------------------|-------------------------------------------------------------------------------------------------------------------------------|------------------|-----------------------------|
| 1    | ≥90%                           | Reactive CD4 and CD8 <5%., HEV, and rare epithelioid histiocytes.                                                             | DN               | CD4                         |
| 2    | ≥90%                           | Reactive CD8 <5%. HEV, rare eosinophils and epithelioid histiocytes; scattered CD20+ B-lymphocytes.                           | CD4              | CD4                         |
| 3    | ≥90%                           | Reactive CD4 and CD8.                                                                                                         | DN               | CD4                         |
| 4    | ≥90%                           | Reactive CD8 <5%. HEV; rare histiocytes; scattered CD20+ B-lymphocytes.                                                       | CD4              | CD4                         |
| 5    | ≥80%                           | Reactive CD8 5%. HEV, moderate amount of histiocytes, rare eosinophils, and CD20+ B-lymphocytes at times in small aggregates. | CD4              | CD4                         |
| 6    | ≥90%                           | Reactive CD8 <2%. Rare HEV and histiocytes.                                                                                   | CD4              | CD4                         |
| 7    | ≥90%                           | Reactive CD8. HEV, epithelioid histiocytes, and eosinophils.                                                                  | CD4              | CD4                         |
| 8    | ≥90%                           | Reactive CD4 and CD8. HEV, epithelioid histiocytes and eosinophils.                                                           | DN               | CD4                         |
| 9    | ≥90%                           | Reactive CD8. HEV and epithelioid histiocytes.                                                                                | CD4              | CD4                         |
| 10   | ≥90%                           | Reactive CD8 <5%. Abundant HEV, rare epithelioid histiocytes.                                                                 | DN               | CD4                         |
| 11   | ≥90%                           | Reactive CD8. HEV, epithelioid histiocytes, and eosinophils.                                                                  | CD8              | CD4                         |
| 12   | ≥90%                           | Reactive CD8 <10%. Rare HEV, epithelioid histiocytes and eosinophils.                                                         | CD4              | CD4                         |
| 13   | ≥90%                           | Reactive CD8 <5%.                                                                                                             | CD4              | CD8                         |
| 14   | ≥90%                           | Reactive CD4 and CD8. HEV.                                                                                                    | DN               | CD8                         |
| 15   | ≥90%                           | HEV, epithelioid histiocytes and eosinophils.                                                                                 | DP               | CD8                         |
| 16   | ≥80%                           | CD20 10%. Some HEV.                                                                                                           | DN               | CD8                         |
| 17   | ≥90%                           | Reactive CD8 2-3%. HEV.                                                                                                       | CD4              | CD8                         |
| 18   | ≥70%                           | Reactive CD8 <20%. HEV and epithelioid histiocytes.                                                                           | CD4              | CD4                         |
| 19   | ≥70%                           | Reactive CD4 and CD8.                                                                                                         | DN               | CD4                         |
| 20   | ≥80%                           | Reactive CD8 <10%. Rare HEV, epithelioid histiocytes and eosinophils.                                                         | DP               | CD4                         |
| 21   | ≥70%                           | Reactive CD8 <15%. Rare HEV and histiocytes.                                                                                  | CD4              | CD4                         |
| 22   | ≥70%                           | Reactive CD4 and CD8. Some histiocytes.                                                                                       | DN               | CD4                         |

|    |      |                                                                            |     |     |
|----|------|----------------------------------------------------------------------------|-----|-----|
| 23 | ≥70% | Reactive CD8 <20%.                                                         | CD4 | CD4 |
| 24 | ≥80% | Reactive CD8 <15%. HEV and eosinophils.                                    | CD4 | CD4 |
| 25 | ≥80% | Reactive CD4 and CD8 <15%. HEV and rare epithelioid histiocytes.           | DN  | CD4 |
| 26 | ≥90% | Reactive CD4 >10%. HEV.                                                    | CD8 | CD4 |
| 27 | ≥70% | Reactive CD8 <20%. Rare HEV and histiocytes.                               | CD4 | CD4 |
| 28 | ≥80% | Reactive CD8 <10%. HEV, some histiocytes and scattered CD20+ B-lymphocytes | DN  | CD4 |

HEV = high endothelium venules

DN=double negative

DP=double positive

\* as found by gene expression analysis

**Table 5s.** Genes over-expressed in PTCL/U vs. normal T-lymphocytes (corresponding to CD4+, CD8+ and HLA-DR+ elements)

| Over-expression (Z score) | Probe set   | Description                                                                                           | Common             | GeneBank  |
|---------------------------|-------------|-------------------------------------------------------------------------------------------------------|--------------------|-----------|
| 6,94                      | 215076_s_at | collagen, type III, alpha 1 (Ehlers-Danlos syndrome type IV, autosomal dominant)                      | <i>COL3A1</i>      | AU144167  |
| 5,35                      | 209687_at   | chemokine (C-X-C motif) ligand 12 (stromal cell-derived factor 1)                                     | <i>CXCL12</i>      | U19495    |
| 5,14                      | 203868_s_at | vascular cell adhesion molecule 1                                                                     | <i>VCAM1</i>       | NM_001078 |
| 4,83                      | 201289_at   | cysteine-rich, angiogenic inducer, 61                                                                 | <i>CYR61</i>       | NM_001554 |
| 4,54                      | 202237_at   | nicotinamide N-methyltransferase                                                                      | <i>NNMT</i>        | NM_006169 |
| 4,04                      | 208782_at   | follistatin-like 1                                                                                    | <i>FSTLI</i>       | BC000055  |
| 3,75                      | 212667_at   | secreted protein, acidic, cysteine-rich (osteonectin)                                                 | <i>SPARC</i>       | AL575922  |
| 3,51                      | 225664_at   | collagen, type XII, alpha 1                                                                           | <i>COL12A1</i>     | AA788946  |
| 8,666                     | 211719_x_at | fibronectin 1                                                                                         | <i>FNI</i>         | BC005858  |
| 6,502                     | 208747_s_at | complement component 1, s subcomponent                                                                | <i>C1S</i>         | M18767    |
| 6,424                     | 218541_s_at | chromosome 8 open reading frame 4                                                                     | <i>C8orf4</i>      | NM_020130 |
| 6,419                     | 225575_at   | leukemia inhibitory factor receptor                                                                   | <i>LIFR</i>        | AI680541  |
| 6,361                     | 205890_s_at | ubiquitin D                                                                                           | <i>UBD (FAT10)</i> | NM_006398 |
| 6,152                     | 211161_s_at |                                                                                                       |                    | AF130082  |
| 5,982                     | 217757_at   | alpha-2-macroglobulin                                                                                 | <i>A2M</i>         | NM_000014 |
| 5,967                     | 201163_s_at | insulin-like growth factor binding protein 7                                                          | <i>IGFBP7</i>      | NM_001553 |
| 5,891                     | 209183_s_at | chromosome 10 open reading frame 10                                                                   | <i>C10orf10</i>    | AL136653  |
| 5,891                     | 212077_at   | caldesmon 1                                                                                           | <i>CALD1</i>       | AL583520  |
| 5,806                     | 218232_at   | complement component 1, q subcomponent, alpha polypeptide                                             | <i>C1QA</i>        | NM_015991 |
| 5,666                     | 209120_at   | nuclear receptor subfamily 2, group F, member 2                                                       | <i>NR2F2</i>       | AL037401  |
| 5,627                     | 219134_at   | EGF, latrophilin and seven transmembrane domain containing 1                                          | <i>ELTD1</i>       | NM_022159 |
| 5,471                     | 200795_at   | SPARC-like 1 (mast9, hevin)                                                                           | <i>SPARCL1</i>     | NM_004684 |
| 5,429                     | 204416_x_at | apolipoprotein C-I                                                                                    | <i>APOC1</i>       | NM_001645 |
| 5,426                     | 211980_at   | collagen, type IV, alpha 1                                                                            | <i>COL4A1</i>      | AI922605  |
| 5,384                     | 202403_s_at | collagen, type I, alpha 2                                                                             | <i>COL1A2</i>      | AA788711  |
| 5,341                     | 200986_at   | serine (or cysteine) proteinase inhibitor, clade G (C1 inhibitor), member 1, (angioedema, hereditary) | <i>SERPING1</i>    | NM_000062 |
| 4,966                     | 202404_s_at |                                                                                                       |                    | NM_000089 |
| 4,925                     | 215388_s_at | H factor (complement)-like 1                                                                          | <i>HFL1</i>        | X56210    |
| 4,758                     | 202411_at   | interferon, alpha-inducible protein 27                                                                | <i>IFI27 (p27)</i> | NM_005532 |
| 4,615                     | 211964_at   | collagen, type IV, alpha 2                                                                            | <i>COL4A2</i>      | X05610    |
| 4,563                     | 204112_s_at | histamine N-methyltransferase                                                                         | <i>HNMT</i>        | NM_006895 |

|       |             |                                                                               |                     |           |
|-------|-------------|-------------------------------------------------------------------------------|---------------------|-----------|
| 4,484 | 235229_at   | olfactory receptor, family 2, subfamily I, member 6                           | <i>OR2I6</i>        | AI694413  |
| 4,445 | 201645_at   | tenascin C (hexabrachion)                                                     | <i>TNC</i>          | NM_002160 |
| 4,389 | 223204_at   | hypothetical protein DKFZp434L142                                             | <i>DKFZp434L142</i> | AF260333  |
| 4,291 | 217853_at   | tensin-like SH2 domain containing 1                                           | <i>TENSI</i>        | NM_022748 |
| 4,234 | 212067_s_at | complement component 1, r subcomponent                                        | <i>C1R</i>          | AL573058  |
| 4,202 | 209289_at   | nuclear factor I/B                                                            | <i>NFIB</i>         | AI700518  |
| 4,053 | 202133_at   | transcriptional co-activator with PDZ-binding motif (TAZ)                     | <i>TAZ</i>          | BF674349  |
| 4,031 | 203131_at   | platelet-derived growth factor receptor, alpha polypeptide                    | <i>PDGFRA</i>       | NM_006206 |
| 3,985 | 201667_at   | gap junction protein, alpha 1, 43kDa (connexin 43)                            | <i>GJAI</i>         | NM_000165 |
| 3,934 | 202800_at   | solute carrier family 1 (glial high affinity glutamate transporter), member 3 | <i>SLCIA3</i>       | NM_004172 |
| 3,923 | 201505_at   | laminin, beta 1                                                               | <i>LAMB1</i>        | NM_002291 |
| 3,916 | 212698_s_at | septin 10                                                                     | <i>SEPT10</i>       | BF966021  |
| 3,858 | 201279_s_at | disabled homolog 2, mitogen-responsive phosphoprotein (Drosophila)            | <i>DAB2</i>         | BC003064  |
| 3,854 | 221748_s_at | tensin                                                                        | <i>TNS</i>          | AL046979  |
| 3,823 | 228220_at   | hypothetical protein BC014311                                                 | <i>LOC115548</i>    | AI627666  |
| 3,765 | 222453_at   | cytochrome b reductase 1                                                      | <i>CYBRD1</i>       | AL136693  |
| 3,739 | 209210_s_at | pleckstrin homology domain containing, family C (with FERM domain) member 1   | <i>PLEKHC1</i>      | Z24725    |
| 3,695 | 212724_at   | ras homolog gene family, member E                                             | <i>ARHE</i>         | BG054844  |
| 3,667 | 207173_x_at | cadherin 11, type 2, OB-cadherin (osteoblast)                                 | <i>CDH11</i>        | D21254    |
| 3,644 | 224894_at   | Yes-associated protein 1, 65kDa                                               | <i>YAP1</i>         | BF247906  |
| 3,638 | 202766_s_at | fibrillin 1 (Marfan syndrome)                                                 | <i>FBN1</i>         | NM_000138 |
| 3,482 | 226621_at   | fibrinogen, gamma polypeptide                                                 | <i>FGG</i>          | AI133452  |
| 3,434 | 225040_s_at | ribulose-5-phosphate-3-epimerase                                              | <i>RPE</i>          | AV699857  |
| 3,415 | 210986_s_at | tropomyosin 1 (alpha)                                                         | <i>TPM1</i>         | Z24727    |
| 3,353 | 209656_s_at | transmembrane 4 superfamily member 10                                         | <i>TM4SF10</i>      | AL136550  |
| 3,247 | 203910_at   | PTPL1-associated RhoGAP 1                                                     | <i>PARG1</i>        | NM_004815 |
| 3,204 | 226022_at   | SAM and SH3 domain containing 1                                               | <i>SASH1</i>        | AU144882  |
| 3,196 | 226837_at   | sprouty-related, EVH1 domain containing 1                                     | <i>SPRED1</i>       | BE967019  |
| 3,194 | 203324_s_at | caveolin 2                                                                    | <i>CAV2</i>         | NM_001233 |
| 3,131 | 202878_s_at | complement component 1, q subcomponent, receptor 1                            | <i>C1QR1</i>        | NM_012072 |
| 3,042 | 202011_at   | tight junction protein 1 (zona occludens 1)                                   | <i>TJP1</i>         | NM_003257 |
| 2,854 | 225202_at   | Rho-related BTB domain containing 3                                           | <i>RHOBTB3</i>      | BE620739  |
| 2,623 | 240481_at   | Transcribed sequences                                                         |                     | BE502509  |

**Table 6s.** Genes down-regulated in PTCL/U vs. normal T-lymphocytes (corresponding CD4+, CD8+ and HLA-DR+ elements)

| Over-expression (Z score) | Probe set    | Description                                                                                                                                                               | Common         | GeneBank  |
|---------------------------|--------------|---------------------------------------------------------------------------------------------------------------------------------------------------------------------------|----------------|-----------|
| 8.006                     | 242832_at    | period homolog 1 (Drosophila)                                                                                                                                             | <i>PER1</i>    | AI743776  |
| 6.542                     | 204621_s_at  | nuclear receptor subfamily 4, group A, member 2                                                                                                                           | <i>NR4A2</i>   | AI935096  |
| 6.105                     | 230511_at    | cAMP responsive element modulator                                                                                                                                         | <i>CREM</i>    | AI800640  |
| 6.003                     | 209959_at    | Human mitogen induced nuclear orphan receptor (MINOR) mRNA, complete cds.                                                                                                 | <i>NR4A3</i>   | U12767    |
| 5.878                     | 242904_x_at  | qr06h10.x1<br>Soares_total_fetus_Nb2HF8_9w<br>Homo sapiens cDNA clone<br>IMAGE:1940131 3' similar to<br>contains MER22.t1 TAR1<br>repetitive element ;, mRNA<br>sequence. | <i>MGC8721</i> | AI351653  |
| 5.583                     | 1555832_s_at | MRNA; cDNA DKFZp564C2063<br>(from clone DKFZp564C2063)                                                                                                                    |                | BU683415  |
| 5.582                     | 218723_s_at  | response gene to complement 32                                                                                                                                            | <i>RGC32</i>   | NM_014059 |
| 5.544                     | 217783_s_at  | yippee protein                                                                                                                                                            | <i>CGI-127</i> | NM_016061 |
| 5.438                     | 238633_at    | enhancer of polycomb homolog 1 (Drosophila)                                                                                                                               | <i>EPC1</i>    | W93523    |
| 5.335                     | 212225_at    | putative translation initiation factor                                                                                                                                    | <i>SUI1</i>    | AL516854  |
| 5.314                     | 225557_at    | AXIN1 up-regulated 1                                                                                                                                                      | <i>AXUD1</i>   | AI091372  |
| 5.302                     | 219228_at    | zinc finger protein 331                                                                                                                                                   | <i>ZNF331</i>  | NM_018555 |
| 5.256                     | 224606_at    | 602363024F1 NIH_MGC_90<br>Homo sapiens cDNA clone<br>IMAGE:4471541 5', mRNA<br>sequence.                                                                                  |                | BG250721  |
| 5.211                     | 222408_s_at  | yippee protein                                                                                                                                                            | <i>CGI-127</i> | BC000836  |
| 5.209                     | 208961_s_at  | core promoter element binding protein                                                                                                                                     | <i>COPEB</i>   | AB017493  |
| 5.155                     | 225951_s_at  | chromodomain helicase DNA binding protein 2                                                                                                                               | <i>CHD2</i>    | AV756026  |
| 4.943                     | 1556873_at   | Homo sapiens hypothetical protein LOC51320, mRNA (cDNA clone IMAGE:4828930), partial cds.                                                                                 | <i>RKHD2</i>   | BC032952  |
| 4.809                     | 202643_s_at  | tumor necrosis factor, alpha-induced protein 3                                                                                                                            | <i>TNFAIP3</i> | AI738896  |
| 4.778                     | 201464_x_at  | v-jun sarcoma virus 17 oncogene homolog (avian)                                                                                                                           | <i>JUN</i>     | BG491844  |



|       |              |                                                                                                                                                                                  |                      |           |
|-------|--------------|----------------------------------------------------------------------------------------------------------------------------------------------------------------------------------|----------------------|-----------|
| 4.778 | 37028_at     | protein phosphatase 1, regulatory (inhibitor) subunit 15A                                                                                                                        | <i>PPP1R15A</i>      | U83981    |
| 4.742 | 209795_at    | CD69 antigen (p60, early T-cell activation antigen)                                                                                                                              | <i>CD69</i>          | L07555    |
| 4.582 | 36711_at     | Human DNA sequence from clone CTA-447C4 on chromosome 22q12.2-13.2, complete sequence.                                                                                           | <i>MAFF</i>          | AL021977  |
| 4.467 | 230380_at    | hypothetical protein DKFZp564I0422                                                                                                                                               | <i>DKFZP564I0422</i> | AW235671  |
| 4.456 | 1557257_at   | B-cell CLL/lymphoma 10                                                                                                                                                           | <i>BCL10</i>         | AA994334  |
| 4.308 | 204794_at    | dual specificity phosphatase 2                                                                                                                                                   | <i>DUSP2</i>         | NM_004418 |
| 4.289 | 202147_s_at  | interferon-related developmental regulator 1                                                                                                                                     | <i>IFRD1</i>         | NM_001550 |
| 4.246 | 228562_at    | zinc finger and BTB domain containing 10                                                                                                                                         | <i>ZBTB10</i>        | N29918    |
| 4.195 | 1555411_a_at | cyclin L1                                                                                                                                                                        | <i>CCNL1</i>         | AF367476  |
| 4.169 | 1559975_at   | Hypothetical protein LOC256021 (LOC256021), mRNA                                                                                                                                 | <i>BTG1</i>          | BC009050  |
| 4.14  | 228097_at    | myosin regulatory light chain interacting protein                                                                                                                                | <i>MYLIP</i>         | AW292746  |
| 4.08  | 203752_s_at  | jun D proto-oncogene                                                                                                                                                             | <i>JUND</i>          | NM_005354 |
| 4.045 | 217741_s_at  | zinc finger protein 216                                                                                                                                                          | <i>ZNF216</i>        | AW471220  |
| 4.043 | 241985_at    | junction-mediating and regulatory protein                                                                                                                                        | <i>JMY</i>           | A1814405  |
| 4.037 | 201751_at    | KIAA0063 gene product                                                                                                                                                            | <i>KIAA0063</i>      | NM_014876 |
| 3.966 | 202704_at    | transducer of ERBB2, 1                                                                                                                                                           | <i>TOB1</i>          | AA675892  |
| 3.94  | 207574_s_at  | growth arrest and DNA-damage-inducible, beta                                                                                                                                     | <i>GADD45B</i>       | NM_015675 |
| 3.935 | 200730_s_at  | 602135085F1 NIH_MGC_81 Homo sapiens cDNA clone IMAGE:4290141 5', mRNA sequence.                                                                                                  | <i>PTP4A1</i>        | BF576710  |
| 3.935 | 209069_s_at  | H3 histone, family 3B (H3.3B)                                                                                                                                                    | <i>H3F3B</i>         | BC001124  |
| 3.922 | 230048_at    | Transcribed sequence with moderate similarity to protein pdb:1LBG (E. coli) B Chain B, Lactose Operon Repressor Bound To 21-Base Pair Symmetric Operator Dna, Alpha Carbons Only |                      | BF061555  |
| 3.91  | 1554306_at   | inositol 1,4,5-trisphosphate 3-kinase B                                                                                                                                          | <i>ITPKB</i>         | BC015009  |
| 3.862 | 230233_at    | RasGEF domain family, member 1B                                                                                                                                                  | <i>RASGEF1B</i>      | BF110534  |
| 3.857 | 211840_s_at  | phosphodiesterase 4D, cAMP-specific (phosphodiesterase E3 dunce homolog, Drosophila)                                                                                             | <i>PDE4D</i>         | U50157    |

|       |              |                                                                                                                               |                 |           |
|-------|--------------|-------------------------------------------------------------------------------------------------------------------------------|-----------------|-----------|
| 3.847 | 231182_at    | Wiskott-Aldrich syndrome protein interacting protein                                                                          | <i>WASPIP</i>   | BF446719  |
| 3.838 | 226153_s_at  | CCR4-NOT transcription complex, subunit 6-like                                                                                | <i>CNOT6L</i>   | AW514857  |
| 3.817 | 1568665_at   | ring finger protein 103                                                                                                       | <i>RNF103</i>   | BC022477  |
| 3.764 | 227558_at    | chromobox homolog 4 (Pc class homolog, Drosophila)                                                                            | <i>CBX4</i>     | AI570531  |
| 3.752 | 203725_at    | growth arrest and DNA-damage-inducible, alpha                                                                                 | <i>GADD45A</i>  | NM_001924 |
| 3.712 | 209510_at    | ring finger 139                                                                                                               | <i>RNF139</i>   | AF064801  |
| 3.683 | 221763_at    | thyroid hormone receptor interactor 8                                                                                         | <i>JMJD1C</i>   | AI694023  |
| 3.65  | 212665_at    | TCDD-inducible poly(ADP-ribose) polymerase                                                                                    | <i>TIPARP</i>   | AL556438  |
| 3.627 | 208706_s_at  | eukaryotic translation initiation factor 5                                                                                    | <i>EIF5</i>     | AK026933  |
| 3.611 | 224569_s_at  | interferon regulatory factor 2 binding protein 2                                                                              | <i>IRF2BP2</i>  | AW242432  |
| 3.575 | 236213_at    | Transcribed sequence with strong similarity to protein ref:NP_060117.2 (H.sapiens) FtsJ homolog 3                             |                 | AI809760  |
| 3.574 | 205214_at    | serine/threonine kinase 17b (apoptosis-inducing)                                                                              | <i>STK17B</i>   | NM_004226 |
| 3.57  | 226650_at    | hypothetical protein LOC90637                                                                                                 | <i>LOC90637</i> | AI984061  |
| 3.566 | 222044_at    | chromosome 20 open reading frame 67                                                                                           | <i>C20orf67</i> | AI199589  |
| 3.544 | 228812_at    | Transcribed sequence with weak similarity to protein ref:NP_060265.1 (H.sapiens) hypothetical protein FLJ20378 [Homo sapiens] |                 | AI652899  |
| 3.541 | 211999_at    | H.sapiens hH3.3B gene for histone H3.3.                                                                                       | <i>H3F3B</i>    | Z48950    |
| 3.519 | 226970_at    | F-box only protein 33                                                                                                         | <i>FBXO33</i>   | AI690694  |
| 3.517 | 214683_s_at  | CDC-like kinase 1                                                                                                             | <i>CLK1</i>     | AI251890  |
| 3.506 | 205281_s_at  | phosphatidylinositol glycan, class A (paroxysmal nocturnal hemoglobinuria)                                                    | <i>PIGA</i>     | NM_002641 |
| 3.488 | 1569136_at   | mannosyl (alpha-1,3-)-glycoprotein beta-1,4-N-acetylglucosaminyltransferase, isoenzyme A                                      | <i>MGAT4A</i>   | BC031487  |
| 3.481 | 210054_at    | hypothetical protein MGC4701                                                                                                  | <i>C4orf15</i>  | BC003648  |
| 3.47  | 1554036_at   | zinc finger protein 450                                                                                                       | <i>ZBTB24</i>   | BC036731  |
| 3.466 | 205027_s_at  | mitogen-activated protein kinase kinase kinase 8                                                                              | <i>MAP3K8</i>   | NM_005204 |
| 3.465 | 218319_at    | pellino homolog 1 (Drosophila)                                                                                                | <i>PEL11</i>    | NM_020651 |
| 3.441 | 1554089_s_at | Shwachman-Bodian-Diamond syndrome pseudogene                                                                                  | <i>SBDS</i>     | BC010183  |
| 3.377 | 223394_at    | SERTA domain containing 1                                                                                                     | <i>SERTAD1</i>  | BC002670  |

|       |              |                                                                                 |                   |           |
|-------|--------------|---------------------------------------------------------------------------------|-------------------|-----------|
| 3.325 | 238893_at    | Hypothetical protein LOC338758, mRNA (cDNA clone IMAGE:5299152), partial cds    | <i>LOC338758</i>  | AI377324  |
| 3.297 | 204243_at    | rearranged L-myc fusion sequence                                                | <i>RLF</i>        | NM_012421 |
| 3.268 | 238389_s_at  | Transcribed sequences                                                           |                   | AI458208  |
| 3.239 | 210426_x_at  | RAR-related orphan receptor A                                                   | <i>RORA</i>       | U04897    |
| 3.183 | 231863_at    | inhibitor of growth family, member 3                                            | <i>ING3</i>       | AF161419  |
| 3.181 | 209184_s_at  | 602127569F1 NIH_MGC_56 Homo sapiens cDNA clone IMAGE:4284401 5', mRNA sequence. | <i>IRS2</i>       | BF700086  |
| 3.177 | 216027_at    | hypothetical protein DJ971N18.2                                                 | <i>DJ971N18.2</i> | AI005473  |
| 3.138 | 218603_at    | headcase homolog (Drosophila)                                                   | <i>HECA</i>       | NM_016217 |
| 3.134 | 223287_s_at  | forkhead box P1                                                                 | <i>FOXP1</i>      | AF146696  |
| 3.124 | 208810_at    | DnaJ (Hsp40) homolog, subfamily B, member 6                                     | <i>DNAJB6</i>     | AF080569  |
| 3.08  | 202393_s_at  | TGFB inducible early growth response                                            | <i>TIEG</i>       | NM_005655 |
| 3.071 | 224836_at    |                                                                                 | <i>C20orf110</i>  | AL109824  |
| 3.064 | 212493_s_at  | huntingtin interacting protein B                                                | <i>HYPB</i>       | AI761110  |
| 3.06  | 212293_at    | homeodomain interacting protein kinase 1                                        | <i>HIPK1</i>      | BG111260  |
| 2.921 | 227650_at    | likely ortholog of mouse heat shock protein, 70 kDa 4                           | <i>HSPA14</i>     | AV757332  |
| 2.882 | 212508_at    | modulator of apoptosis 1                                                        | <i>MOAP1</i>      | AK024029  |
| 2.87  | 210281_s_at  | zinc finger protein 198                                                         | <i>ZNF198</i>     | AL136621  |
| 2.867 | 206374_at    | dual specificity phosphatase 8                                                  | <i>DUSP8</i>      | NM_004420 |
| 2.796 | 1552542_s_at | T-cell activation GTPase activating protein                                     | <i>TAGAP</i>      | NM_138810 |
| 2.794 | 202302_s_at  | similar to splicing factor, arginine/serine-rich 4                              | <i>FLJ11021</i>   | NM_023012 |
| 2.671 | 200694_s_at  | DEAD (Asp-Glu-Ala-Asp) box polypeptide 24                                       | <i>DDX24</i>      | NM_020414 |
| 2.665 | 229106_at    | dynein light chain 2                                                            | <i>Dlc2</i>       | AA401429  |
| 2.632 | 218205_s_at  | MAP kinase-interacting serine/threonine kinase 2                                | <i>MKNK2</i>      | NM_017572 |

**Table 7s.** Top 10 categories of genes up-regulated in PTCL/U vs. normal T-lymphocytes (corresponding to CD4+, CD8+ and HLA-DR+ elements), ranked according with analysis performed with EASE

| <i>System</i>         | <i>Gene Category</i>                         | <i>List Hits</i> | <i>List Total</i> | <i>Population Hits</i> | <i>Population Total</i> | <i>Fisher Exact test probability</i> | <i>Bonferroni</i> | <i>Gene identifiers</i>                                                       | <i>Affymetrix probesets</i>                                                                                                                                            |
|-----------------------|----------------------------------------------|------------------|-------------------|------------------------|-------------------------|--------------------------------------|-------------------|-------------------------------------------------------------------------------|------------------------------------------------------------------------------------------------------------------------------------------------------------------------|
| GO Biological Process | cell adhesion                                | 13               | 48                | 596                    | 12580                   | 2,22E-07                             | 8,34E-05          | 390; 1009; 1278; 1282; 1303; 2335; 3371; 3491; 3912; 6387; 7412; 10979; 22918 | 201289_AT; 201505_AT; 201645_AT; 202403_S_AT; 202404_S_AT; 202878_S_AT; 203868_S_AT; 207173_X_AT; 209210_S_AT; 209687_AT; 211719_X_AT; 211980_AT; 212724_AT; 225664_AT |
| GO Biological Process | circulation                                  | 6                | 48                | 113                    | 12580                   | 4,15E-06                             | 1,56E-03          | 710; 1281; 2266; 2697; 6387; 7168                                             | 200986_AT; 201667_AT; 209687_AT; 210986_S_AT; 215076_S_AT; 226621_AT                                                                                                   |
| GO Biological Process | complement activation\, classical pathway    | 4                | 48                | 31                     | 12580                   | 5,44E-06                             | 2,05E-03          | 710; 712; 715; 716                                                            | 200986_AT; 208747_S_AT; 212067_S_AT; 218232_AT                                                                                                                         |
| GO Biological Process | complement activation                        | 4                | 48                | 41                     | 12580                   | 1,70E-05                             | 6,40E-03          | 710; 712; 715; 716                                                            | 200986_AT; 208747_S_AT; 212067_S_AT; 218232_AT                                                                                                                         |
| GO Biological Process | humoral defense mechanism (sensu Vertebrata) | 5                | 48                | 128                    | 12580                   | 0,000121606                          | 4,57E-02          | 710; 712; 715; 716; 10537                                                     | 200986_AT; 205890_S_AT; 208747_S_AT; 212067_S_AT; 218232_AT                                                                                                            |
| GO Biological Process | response to pest/pathogen/p arasite          | 8                | 48                | 463                    | 12580                   | 0,000327109                          | 1,23E-01          | 710; 712; 715; 716; 2335; 6387; 10537; 22918                                  | 200986_AT; 202878_S_AT; 205890_S_AT; 208747_S_AT; 209687_AT; 211719_X_AT; 212067_S_AT; 218232_AT                                                                       |
| GO Biological Process | humoral immune response                      | 5                | 48                | 170                    | 12580                   | 0,000454773                          | 1,71E-01          | 710; 712; 715; 716; 10537                                                     | 200986_AT; 205890_S_AT; 208747_S_AT; 212067_S_AT; 218232_AT                                                                                                            |
| GO Biological Process | immune response                              | 9                | 48                | 724                    | 12580                   | 0,001458541                          | 5,48E-01          | 710; 712; 715; 716; 2335; 3429; 6387; 10537; 22918                            | 200986_AT; 202411_AT; 202878_S_AT; 205890_S_AT; 208747_S_AT; 209687_AT; 211719_X_AT; 212067_S_AT; 218232_AT                                                            |
| GO Biological Process | skeletal development                         | 4                | 48                | 135                    | 12580                   | 0,001712203                          | 6,44E-01          | 1009; 1278; 1303; 2200                                                        | 202403_S_AT; 202404_S_AT; 202766_S_AT; 207173_X_AT; 225664_AT                                                                                                          |

|                       |                  |   |    |     |       |             |          |                                                    |                                                                                                             |
|-----------------------|------------------|---|----|-----|-------|-------------|----------|----------------------------------------------------|-------------------------------------------------------------------------------------------------------------|
| GO Biological Process | defense response | 9 | 48 | 814 | 12580 | 0,003250129 | 1,00E+00 | 710; 712; 715; 716; 2335; 3429; 6387; 10537; 22918 | 200986_AT; 202411_AT; 202878_S_AT; 205890_S_AT; 208747_S_AT; 209687_AT; 211719_X_AT; 212067_S_AT; 218232_AT |
|-----------------------|------------------|---|----|-----|-------|-------------|----------|----------------------------------------------------|-------------------------------------------------------------------------------------------------------------|

**Table 8s.** Top 10 categories of genes down-regulated in PTCL/U vs. normal T-lymphocytes (corresponding to CD4+, CD8+ and HLA-DR+ elements), ranked according with analysis performed with EASE

| System                | Gene Category                                                    | List Hits | List Total | Population Hits | Population Total | Fisher Exact test probability | Bonferroni | Gene identifiers                                                                                                                                                       | Affymetrix probesets                                                                                                                                                                                                                                                                                                           |
|-----------------------|------------------------------------------------------------------|-----------|------------|-----------------|------------------|-------------------------------|------------|------------------------------------------------------------------------------------------------------------------------------------------------------------------------|--------------------------------------------------------------------------------------------------------------------------------------------------------------------------------------------------------------------------------------------------------------------------------------------------------------------------------|
| GO Biological Process | regulation of transcription\, DNA-dependent                      | 21        | 60         | 1981            | 12580            | 0,000196281                   | 5,91E-02   | 1316; 1390; 3725; 3727; 4780; 4929; 5187; 6018; 6095; 7071; 7750; 8013; 8535; 23764; 27086; 29072; 29950; 51696; 54556; 55422; 221037                                  | 201464_X_AT; 202393_S_AT; 203752_S_AT; 204243_AT; 204621_S_AT; 208961_S_AT; 209959_AT; 210281_S_AT; 210426_X_AT; 212493_S_AT; 218603_AT; 219228_AT; 221763_AT; 223287_S_AT; 223394_AT; 227558_AT; 230511_AT; 231863_AT; 236213_AT; 242832_AT; 36711_AT                                                                         |
| GO Biological Process | transcription                                                    | 22        | 60         | 2139            | 12580            | 0,000200953                   | 6,05E-02   | 1316; 1390; 3725; 3727; 4780; 4929; 5187; 6018; 6095; 7071; 7750; 8013; 8535; 23764; 27086; 29072; 29950; 51696; 54556; 55422; 80314; 221037                           | 201464_X_AT; 202393_S_AT; 203752_S_AT; 204243_AT; 204621_S_AT; 208961_S_AT; 209959_AT; 210281_S_AT; 210426_X_AT; 212493_S_AT; 218603_AT; 219228_AT; 221763_AT; 223287_S_AT; 223394_AT; 227558_AT; 230511_AT; 231863_AT; 236213_AT; 238633_AT; 242832_AT; 36711_AT                                                              |
| GO Biological Process | regulation of transcription                                      | 21        | 60         | 2013            | 12580            | 0,000246752                   | 7,43E-02   | 1316; 1390; 3725; 3727; 4780; 4929; 5187; 6018; 6095; 7071; 7750; 8013; 8535; 23764; 27086; 29072; 29950; 51696; 54556; 55422; 221037                                  | 201464_X_AT; 202393_S_AT; 203752_S_AT; 204243_AT; 204621_S_AT; 208961_S_AT; 209959_AT; 210281_S_AT; 210426_X_AT; 212493_S_AT; 218603_AT; 219228_AT; 221763_AT; 223287_S_AT; 223394_AT; 227558_AT; 230511_AT; 231863_AT; 236213_AT; 242832_AT; 36711_AT                                                                         |
| GO Biological Process | transcription\, DNA-dependent                                    | 21        | 60         | 2066            | 12580            | 0,000356077                   | 1,07E-01   | 1316; 1390; 3725; 3727; 4780; 4929; 5187; 6018; 6095; 7071; 7750; 8013; 8535; 23764; 27086; 29072; 29950; 51696; 54556; 55422; 221037                                  | 201464_X_AT; 202393_S_AT; 203752_S_AT; 204243_AT; 204621_S_AT; 208961_S_AT; 209959_AT; 210281_S_AT; 210426_X_AT; 212493_S_AT; 218603_AT; 219228_AT; 221763_AT; 223287_S_AT; 223394_AT; 227558_AT; 230511_AT; 231863_AT; 236213_AT; 242832_AT; 36711_AT                                                                         |
| GO Biological Process | regulation of CDK activity                                       | 3         | 60         | 39              | 12580            | 0,000834283                   | 2,51E-01   | 1647; 28984; 29950                                                                                                                                                     | 203725_AT; 218723_S_AT; 223394_AT                                                                                                                                                                                                                                                                                              |
| GO Biological Process | nucleobase\, nucleoside\, nucleotide and nucleic acid metabolism | 26        | 60         | 3085            | 12580            | 0,001058108                   | 3,18E-01   | 1316; 1390; 1647; 3021; 3725; 3727; 4780; 4929; 5187; 6018; 6095; 7071; 7750; 8013; 8535; 23764; 27086; 29072; 29950; 51696; 54556; 55422; 57062; 65117; 80314; 221037 | 200694_S_AT; 201464_X_AT; 202302_S_AT; 202393_S_AT; 203725_AT; 203752_S_AT; 204243_AT; 204621_S_AT; 208961_S_AT; 209069_S_AT; 209959_AT; 210281_S_AT; 210426_X_AT; 211999_AT; 212493_S_AT; 218603_AT; 219228_AT; 221763_AT; 223287_S_AT; 223394_AT; 227558_AT; 230511_AT; 231863_AT; 236213_AT; 238633_AT; 242832_AT; 36711_AT |
| GO Biological Process | protein kinase cascade                                           | 5         | 60         | 168             | 12580            | 0,001208136                   | 3,64E-01   | 1844; 1850; 2872; 4616; 9262                                                                                                                                           | 204794_AT; 205214_AT; 206374_AT; 207574_S_AT; 218205_S_AT                                                                                                                                                                                                                                                                      |
| GO Biological Process | G2/M transition of mitotic cell cycle                            | 3         | 60         | 46              | 12580            | 0,00135333                    | 4,07E-01   | 1647; 28984; 29950                                                                                                                                                     | 203725_AT; 218723_S_AT; 223394_AT                                                                                                                                                                                                                                                                                              |
| GO Biological Process | MAPKKK cascade                                                   | 3         | 60         | 52              | 12580            | 0,001930725                   | 5,81E-01   | 1844; 1850; 4616                                                                                                                                                       | 204794_AT; 206374_AT; 207574_S_AT                                                                                                                                                                                                                                                                                              |

|                       |                      |   |    |    |       |             |          |            |                      |
|-----------------------|----------------------|---|----|----|-------|-------------|----------|------------|----------------------|
| GO Biological Process | inactivation of MAPK | 2 | 60 | 15 | 12580 | 0,002256925 | 6,79E-01 | 1844; 1850 | 204794_AT; 206374_AT |
|-----------------------|----------------------|---|----|----|-------|-------------|----------|------------|----------------------|

**Table 9s.** Genes differentially expressed in PTCL/U vs. the other PTCLs (i.e. AITL plus ALCL). Notably, all these genes are down-regulated in PTCL/U.

| Zscore | Gene         | Common           | GeneBank  | Description                                                                                                                          |
|--------|--------------|------------------|-----------|--------------------------------------------------------------------------------------------------------------------------------------|
| 3.707  | 212859_x_at  | <i>MTIE</i>      | BF217861  | metallothionein 2A                                                                                                                   |
| 2.449  | 210524_x_at  | <i>MTIF</i>      | AF078844  | C-terminus similar to human metallothionein-IF: Swiss-Prot Accession Number P04733; Homo sapiens hqp0376 protein mRNA, complete cds. |
| 2.354  | 202424_at    | <i>MAP2K2</i>    | NM_030662 | mitogen-activated protein kinase kinase 2                                                                                            |
| 2.286  | 215001_s_at  | <i>GLUL</i>      | AL161952  | glutamate-ammonia ligase (glutamine synthase)                                                                                        |
| 2.222  | 1558836_at   |                  | BQ024490  | UI-1-BB1p-aut-f-08-0-UI.s1 NCI_CGAP_PI6 Homo sapiens cDNA clone UI-1-BB1p-aut-f-08-0-UI 3', mRNA sequence.                           |
| 2.068  | 217762_s_at  | <i>RAB31</i>     | BE789881  | RAB31, member RAS oncogene family                                                                                                    |
| 2.046  | 222670_s_at  | <i>MAFB</i>      | AW135013  | v-maf musculoaponeurotic fibrosarcoma oncogene homolog B (avian)                                                                     |
| 2.035  | 202759_s_at  | <i>AKAP2</i>     | BE879367  | paralemmin 2                                                                                                                         |
| 1.998  | 206359_at    | <i>SOCS3</i>     | BG035761  | suppressor of cytokine signaling 3                                                                                                   |
| 1.933  | 203973_s_at  | <i>CEBPD</i>     | NM_005195 | KIAA0146 protein                                                                                                                     |
| 1.898  | 1558837_a_at |                  | BQ024490  | UI-1-BB1p-aut-f-08-0-UI.s1 NCI_CGAP_PI6 Homo sapiens cDNA clone UI-1-BB1p-aut-f-08-0-UI 3', mRNA sequence.                           |
| 1.85   | 204166_at    | <i>KIAA0963</i>  | NM_014963 |                                                                                                                                      |
| 1.82   | 212527_at    | <i>DI5Wsu75e</i> | BF057059  | DNA segment, Chr 15, Wayne State University 75, expressed                                                                            |
| 1.766  | 213733_at    | <i>MYOIF</i>     | BF740152  | myosin IF                                                                                                                            |
| 1.754  | 221484_at    | <i>B4GALT5</i>   | BF691447  | UDP-Gal:betaGlcNAc beta 1,4- galactosyltransferase, polypeptide 5                                                                    |
| 1.751  | 231241_at    |                  | AW469714  | Transcribed sequence with moderate similarity to protein ref:NP_055224.1 (H.sapiens) PCAF associated factor 65 beta [Homo sapiens]   |
| 1.75   | 234973_at    | <i>SLC38A5</i>   | BG325630  | solute carrier family 38, member 5                                                                                                   |
| 1.732  | 204908_s_at  | <i>BCL3</i>      | NM_005178 | B-cell CLL/lymphoma 3                                                                                                                |
| 1.732  | 206540_at    | <i>GLBIL</i>     | NM_024506 | galactosidase, beta 1-like                                                                                                           |
| 1.687  | 221006_s_at  | <i>SNX27</i>     | NM_030918 | sorting nexin family member 27                                                                                                       |
| 1.645  | 225922_at    | <i>KIAA1450</i>  | BE501838  | KIAA1450 protein                                                                                                                     |
| 1.554  | 228325_at    | <i>KIAA0146</i>  | AI363213  | KIAA0146 protein                                                                                                                     |
| 1.534  | 212506_at    | <i>PICALM</i>    | AL135735  | phosphatidylinositol binding clathrin assembly protein                                                                               |
| 1.419  | 222303_at    |                  | AV700891  | v-ets erythroblastosis virus E26 oncogene homolog 2 (avian)                                                                          |



|       |           |              |          |                                                                                                |
|-------|-----------|--------------|----------|------------------------------------------------------------------------------------------------|
| 1.343 | 242188_at |              | AI743332 | Transcribed sequences                                                                          |
| 1.306 | 212606_at | <i>WDFY3</i> | AL536319 | AL536319 Homo sapiens FETAL BRAIN Homo sapiens cDNA clone CS0DF015YG13 3-PRIME, mRNA sequence. |
| 1.303 | 209234_at | <i>KIF1B</i> | BF939474 | kinesin family member 1B                                                                       |
| 1.293 | 225415_at | <i>BBAP</i>  | AA577672 | rhysin 2                                                                                       |

## Supplementary Methods

### *Generation of Gene Expression Profiles*

Total RNA was extracted using the TRIzol reagent (Invitrogen and Life Technologies) and purified using the Rneasy Kit (QIAGEN). Double-strand cDNA was generated from 5 µg of total RNA using the Super-Script Choice System (Invitrogen and Life Technologies) and a poly-dT oligonucleotide that contained a T7 RNA polymerase initiation site. The double-strand cDNA was used as template to generate biotinylated cRNA by in vitro transcription using MEGAscript T7 High Yield Transcription kit (Ambion), biotin-11-CTP, and biotin-11-UTP (PerkinElmer). The biotinylated cRNA was purified by the RNeasy Kit (QIAGEN) and fragmented according to the Affymetrix, Inc. protocol. 15 µg of fragmented cRNA was hybridized to HG-U133 2.0 plus microarrays (Affymetrix, Inc.). The gene expression values were determined by MAS 5 algorithm in GCOS 1.2; Affymetrix, Inc.

### *Gene Expression Profiles Analysis*

The dendrogram (Figure 1 and 1s) was generated using a hierarchical clustering algorithm based on the average-linkage method (Hartigan et al, 1975; Eisen et al, 1998). Only genes displaying a twofold average change in the expression level across the whole panel were chosen to generate the hierarchical clustering. The expression value of each selected gene is normalized to have a zero mean value and unit standard deviation. The distance between two individual samples was calculated by Pearson distance with the normalized expression values. To perform the supervised gene expression analysis (Figures 2-5), we used the Genes@Work software platform, which is a gene expression analysis tool based on the pattern discovery algorithm and structural pattern localization analysis by sequential histograms (Califano, 2000; Califano et al, 2000). In the matrix, each column represents a sample and each row represents a gene. The color scale bar shows the relative gene expression changes normalized by the standard deviation (0 is the mean expression

level of a given gene). The classification method used for the cell type classification (Figures 2-4) was described previously (Klein et al, 2001). In brief, the classifier is a scoring function based on the values of a set of genes (gene cluster), which are differentially expressed in two sets of cell types, and thus, can be used for cell type classification. The higher the score, the more likely it is that a cell type is related to the phenotype set.

The EASE software was applied in order to establish whether specific cell functions and biological processes, defined according to gene ontology (Jenssen et al, 2001; Hosack et al, 2003), were significantly represented among the deregulated genes.
